# Supplementary figures and images for: The Effect of Date Palm Genotypes on Rhizobacterial Community Structures under Saline Environments
Source: MDPI journal article supplement (doi:10.3390/biology11111666), 2022-11-15

The colors scale:

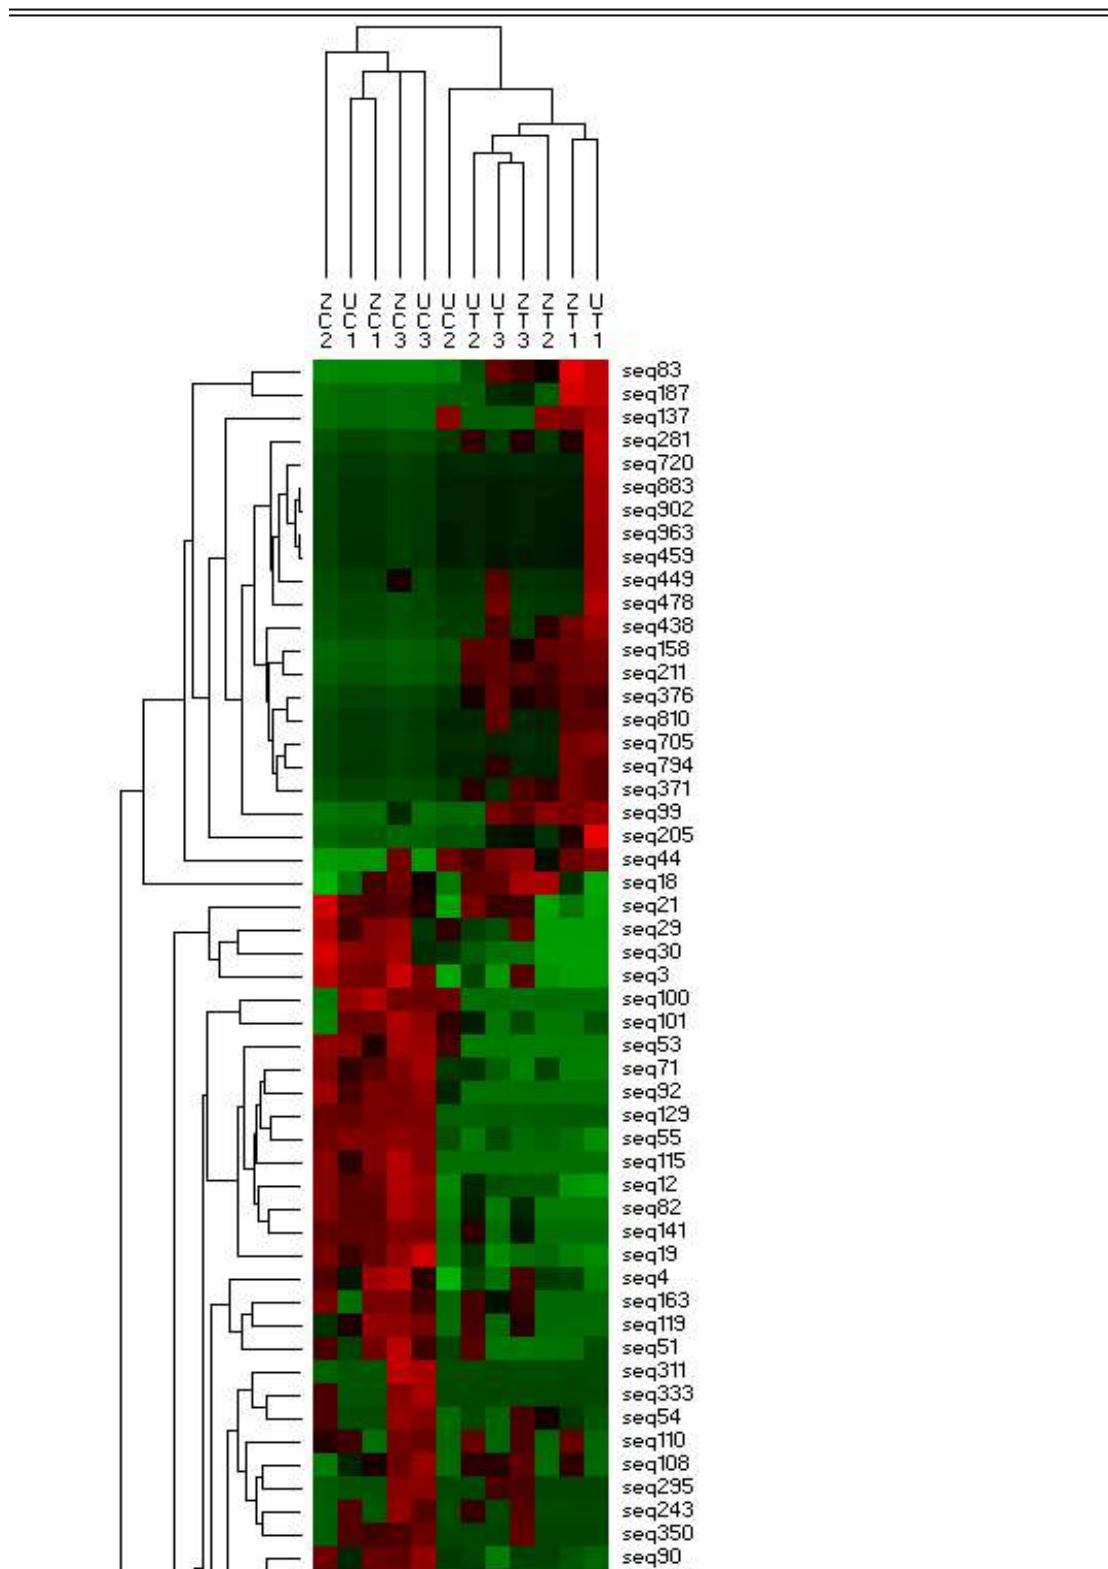

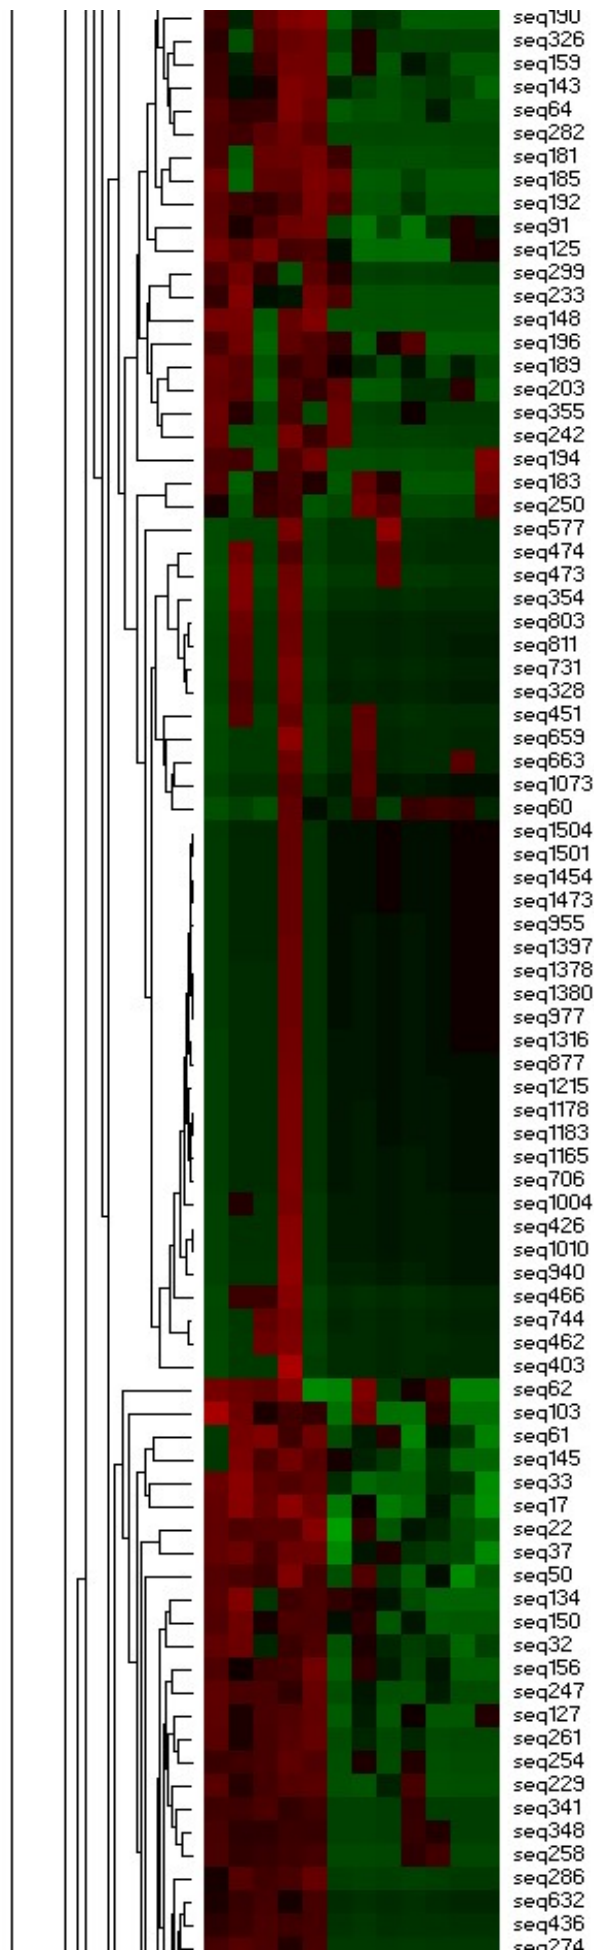

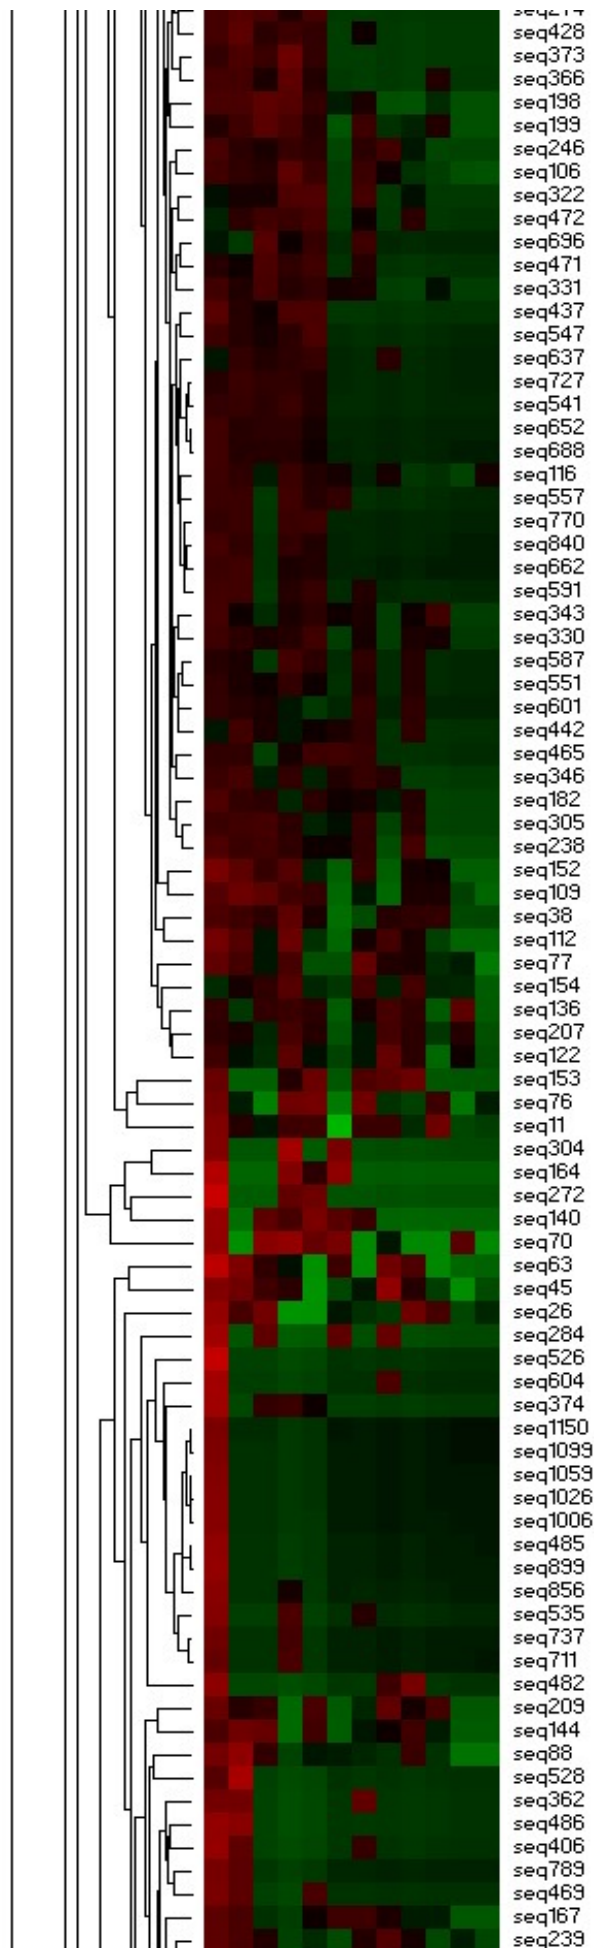

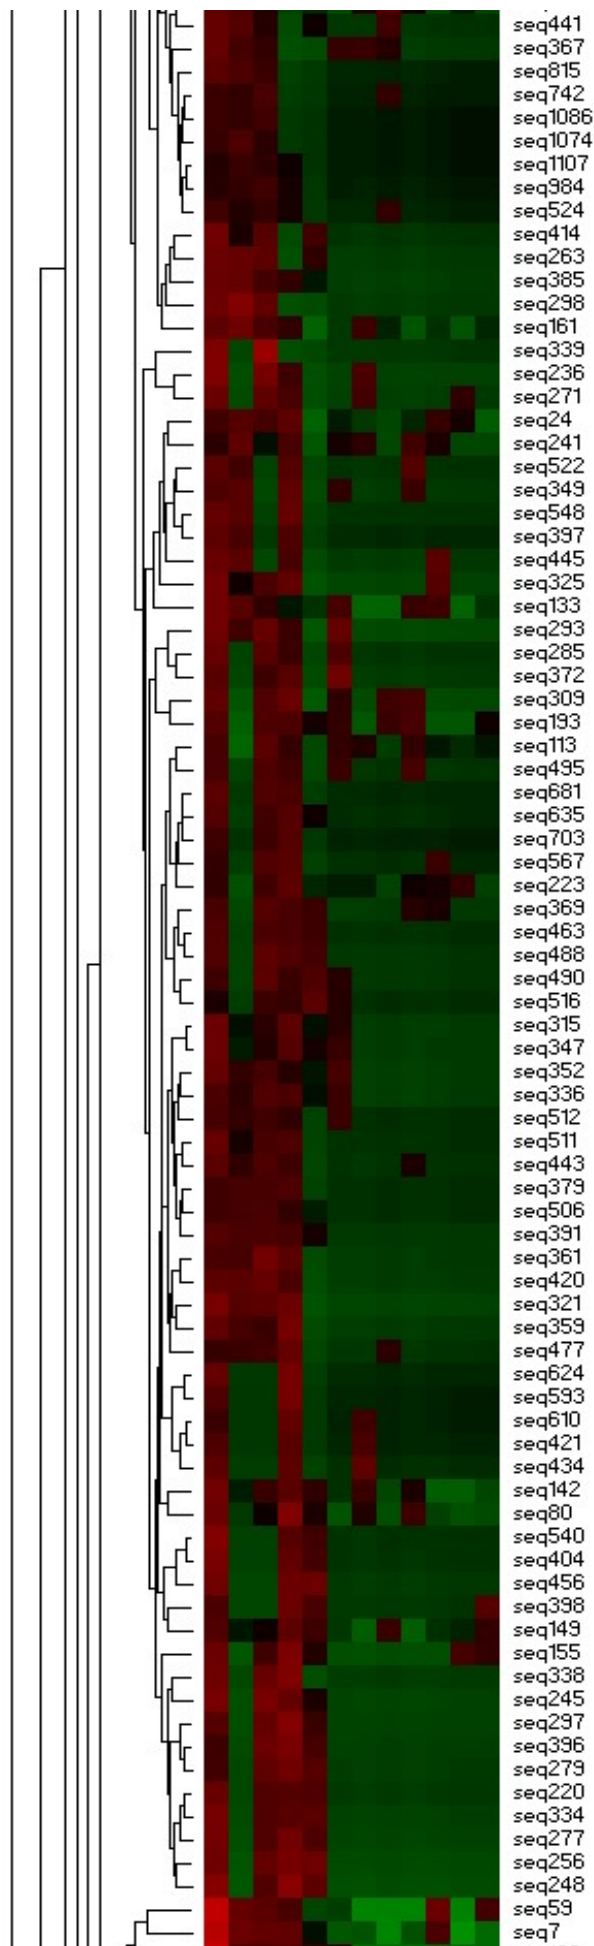

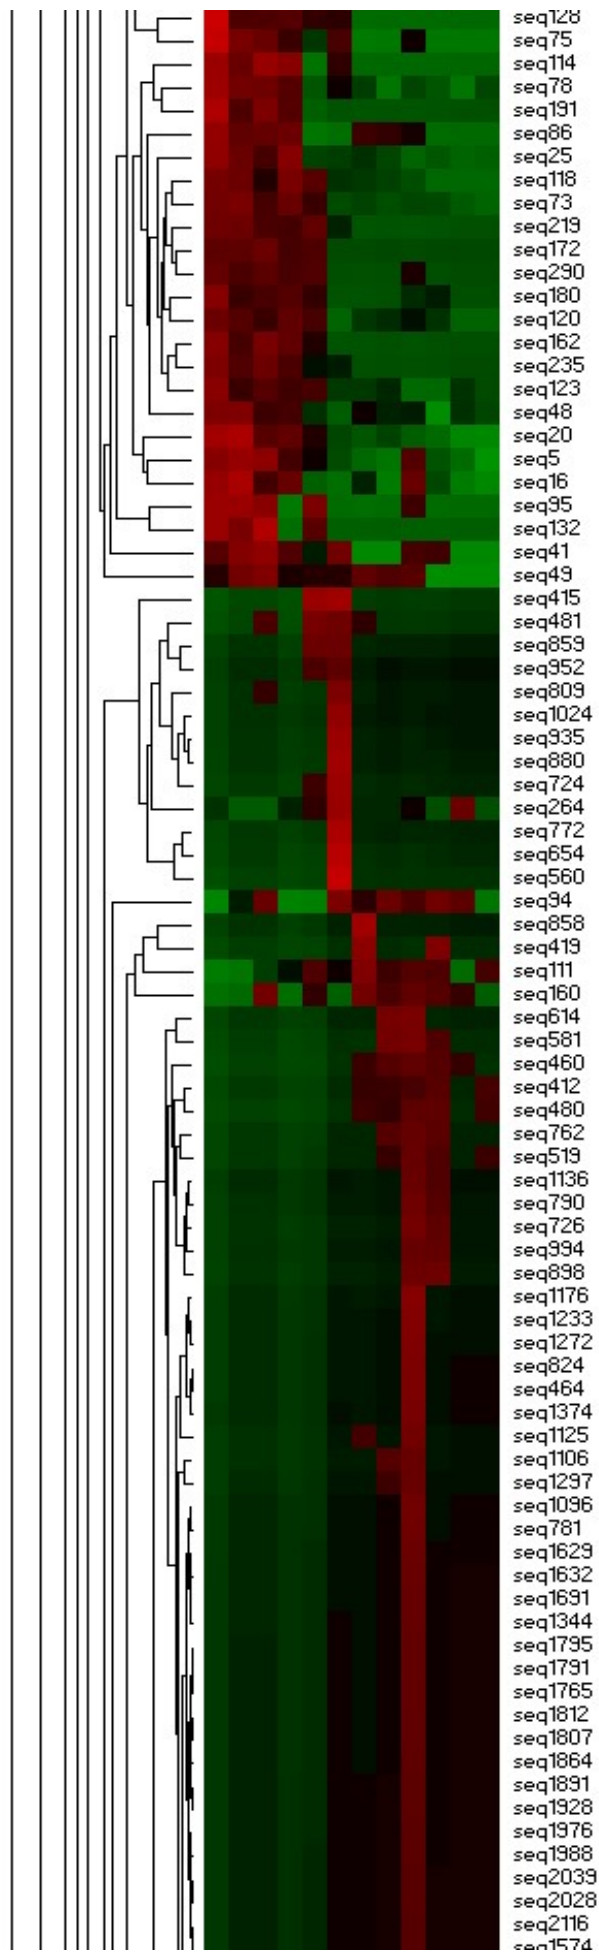

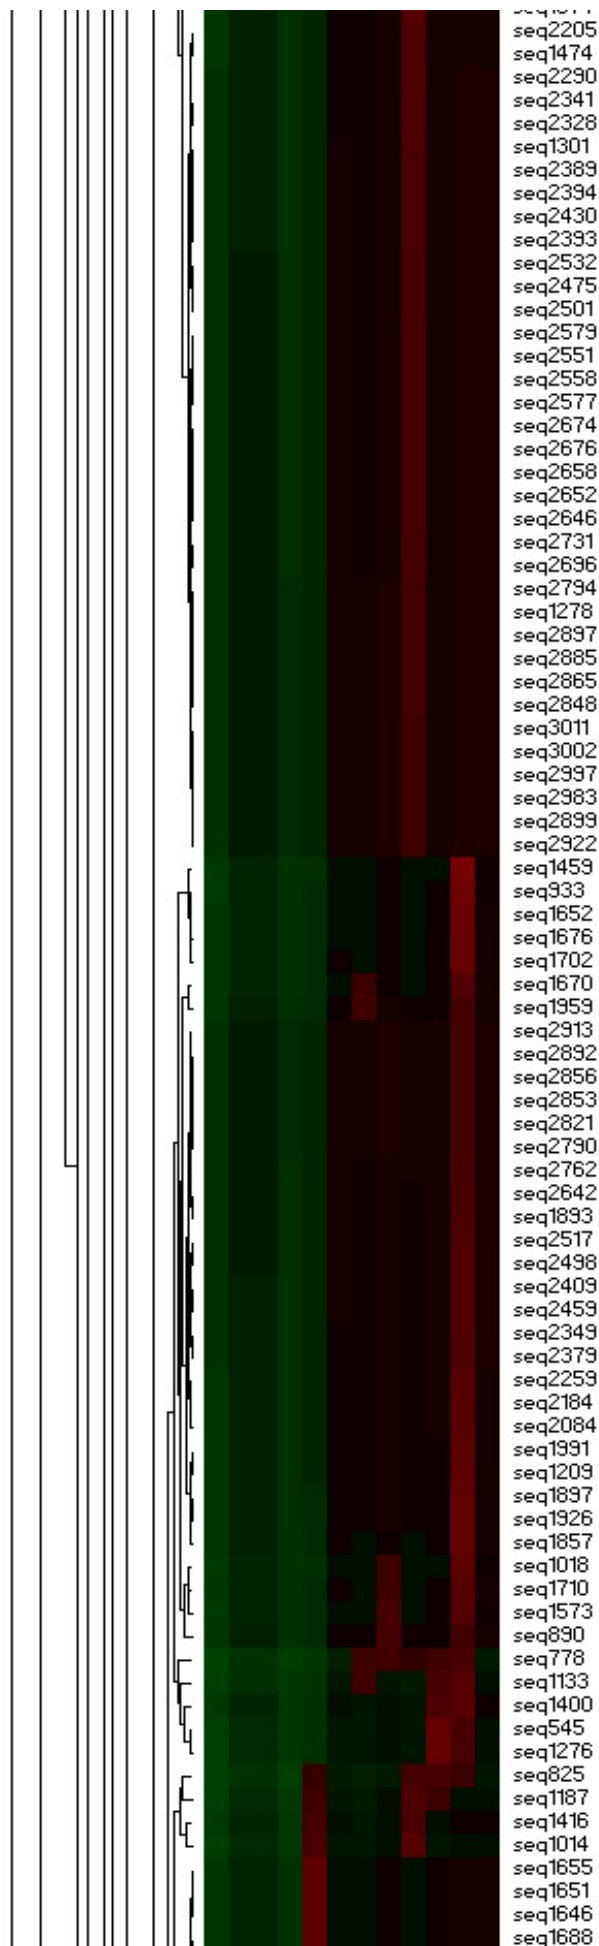



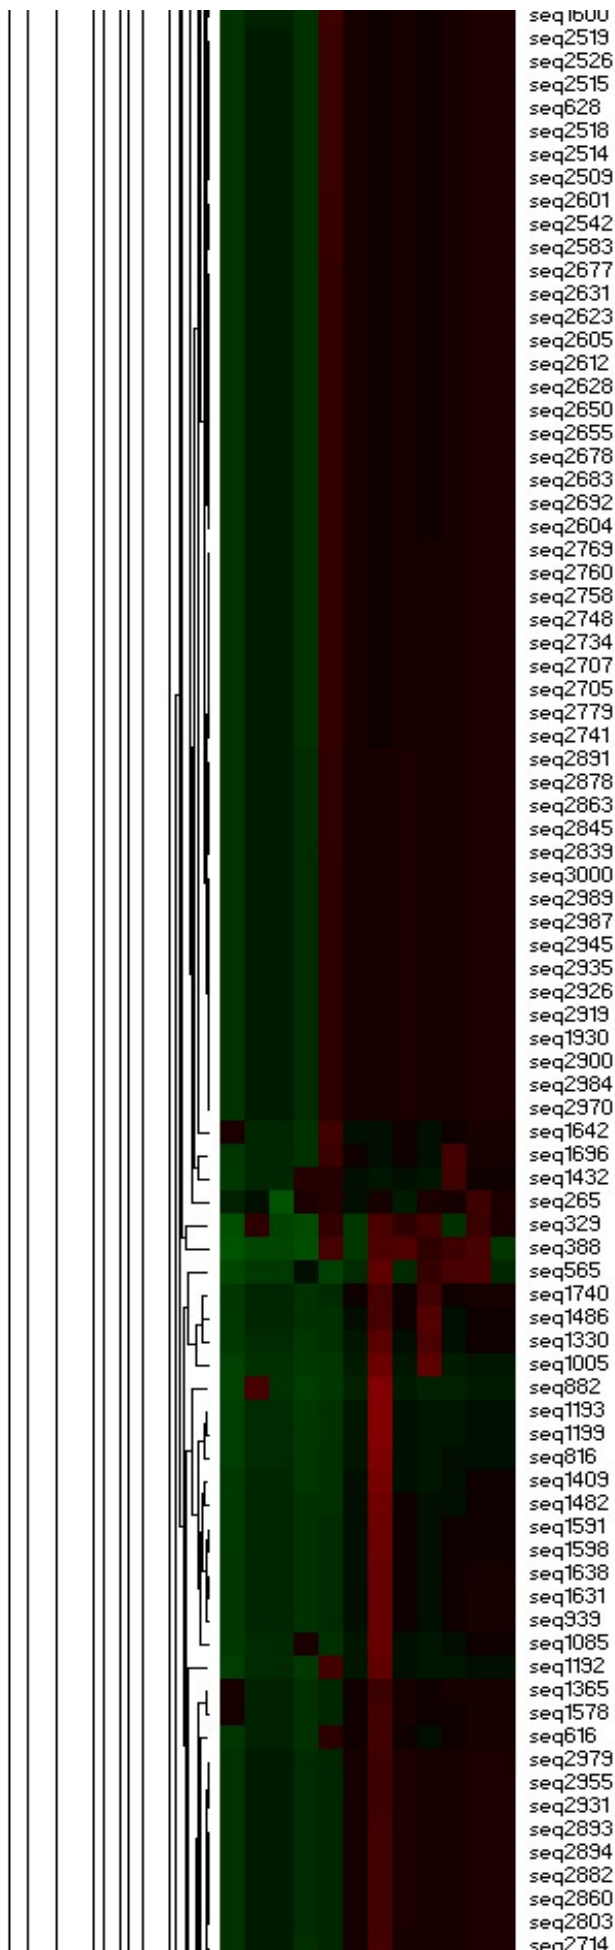



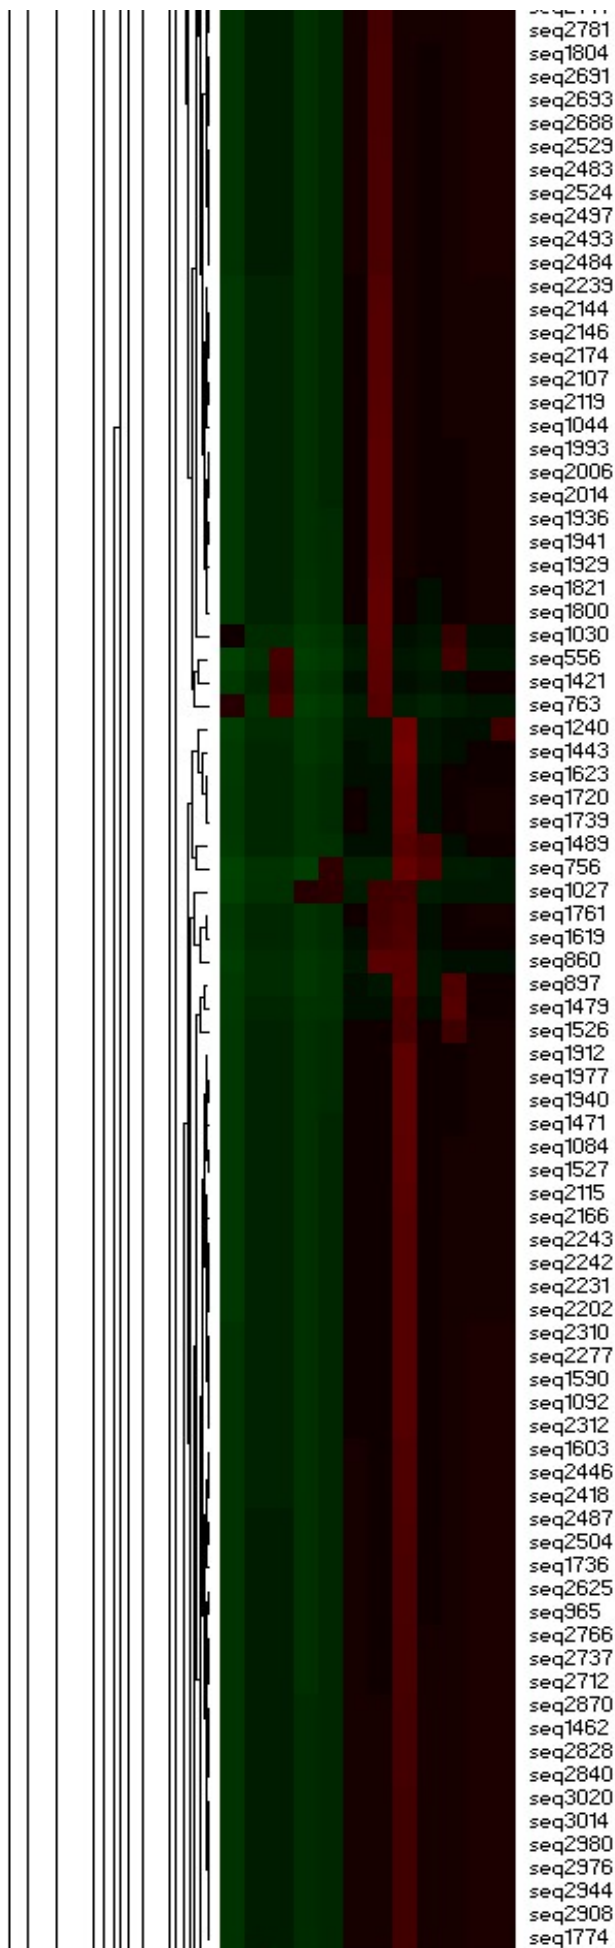



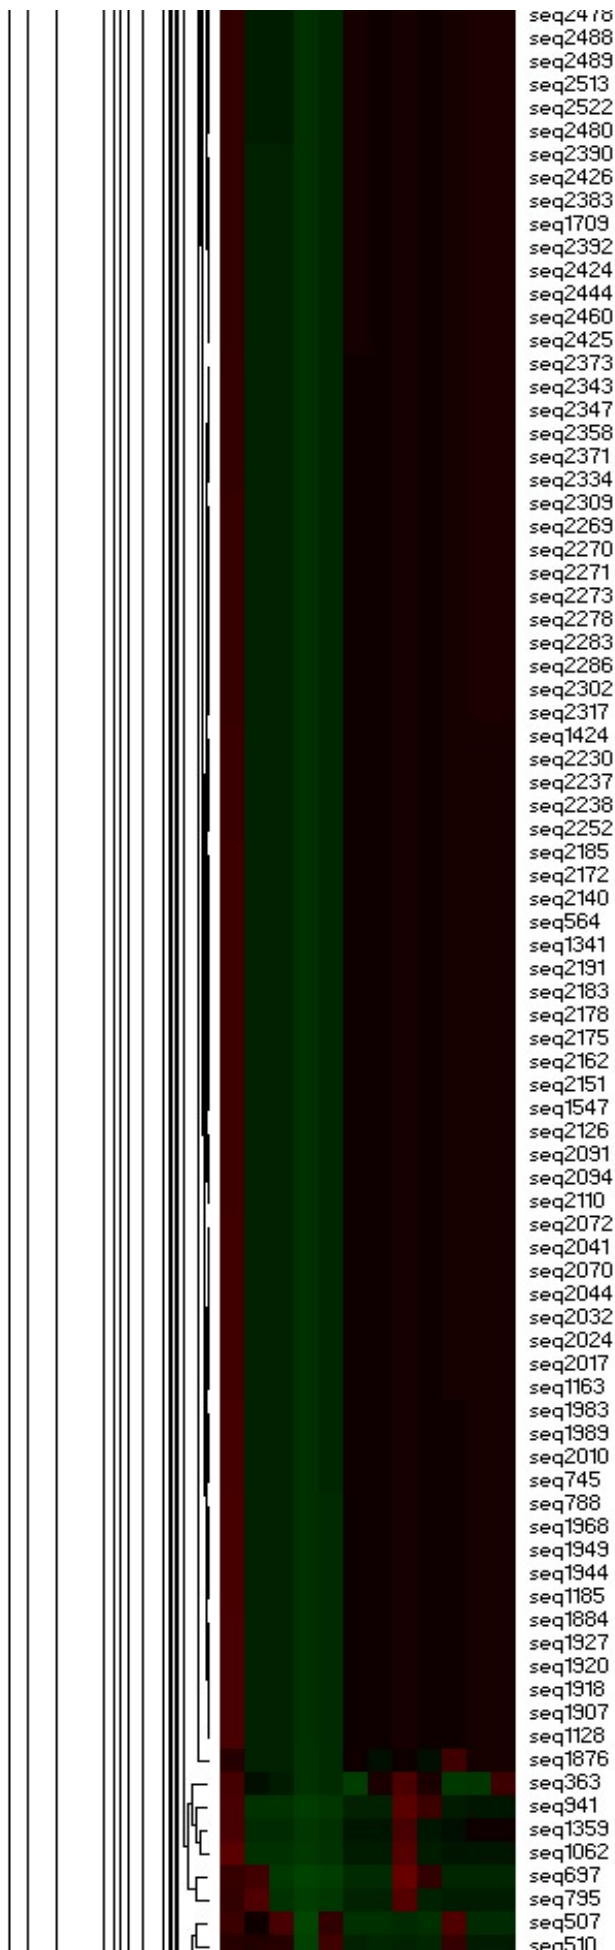

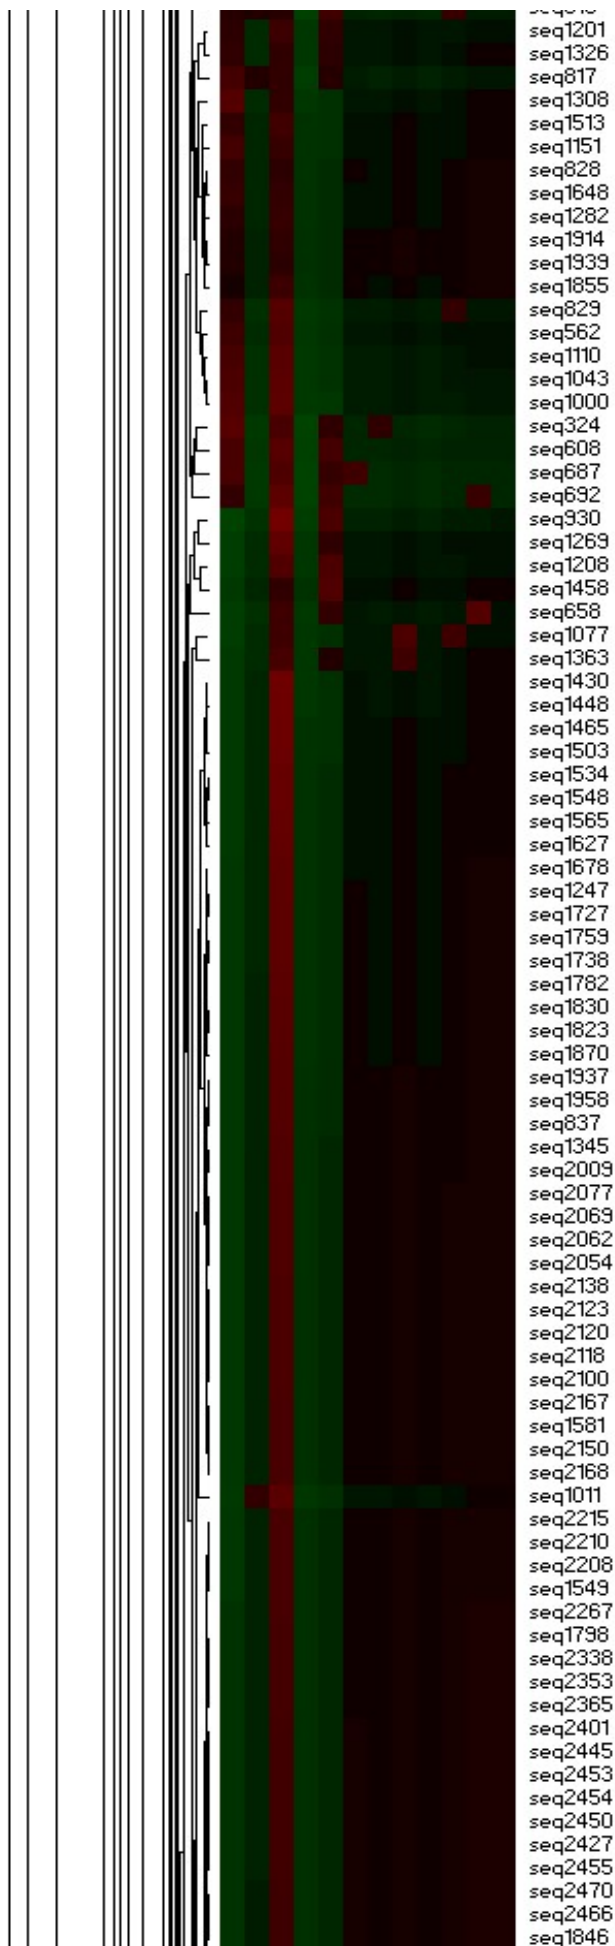

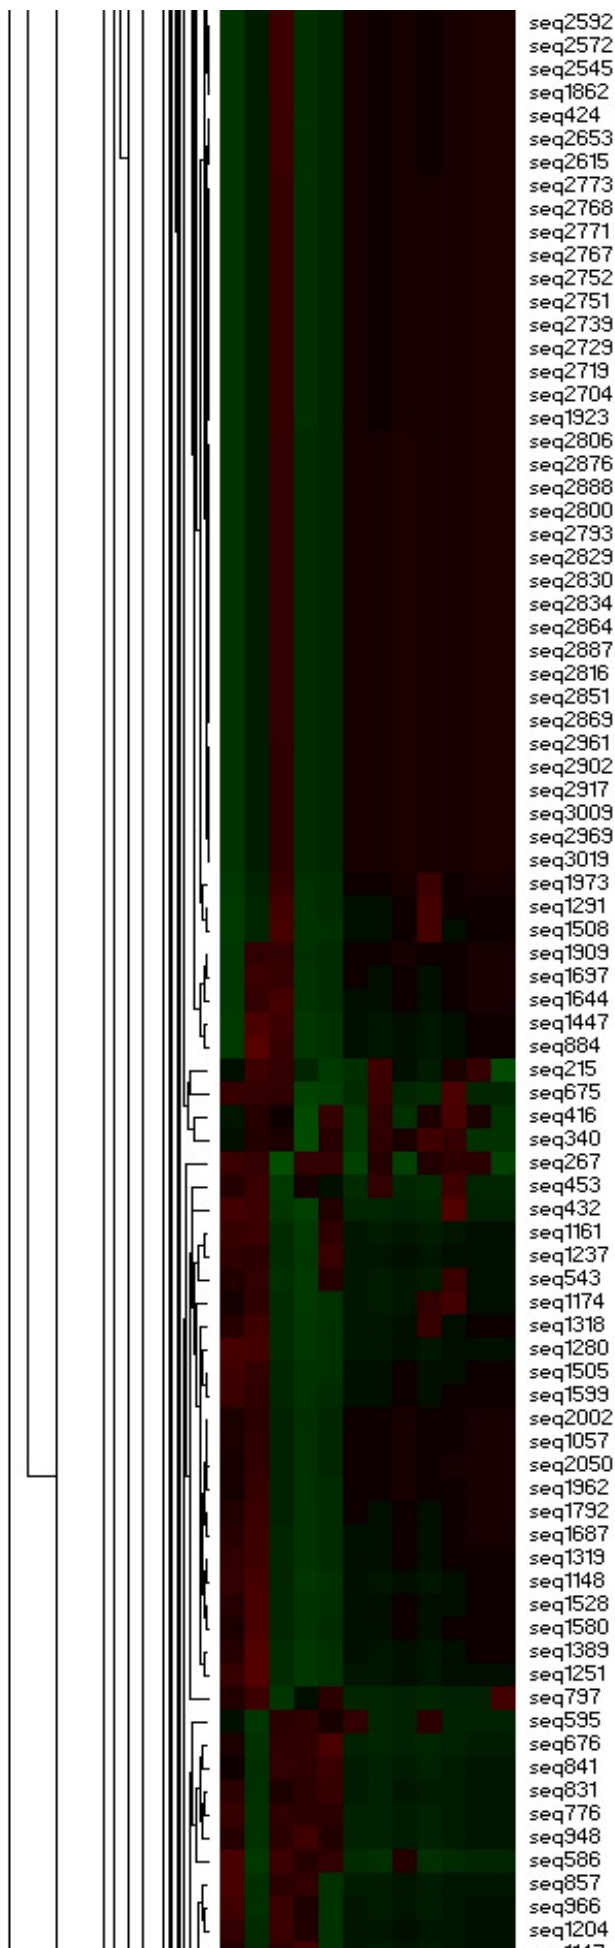



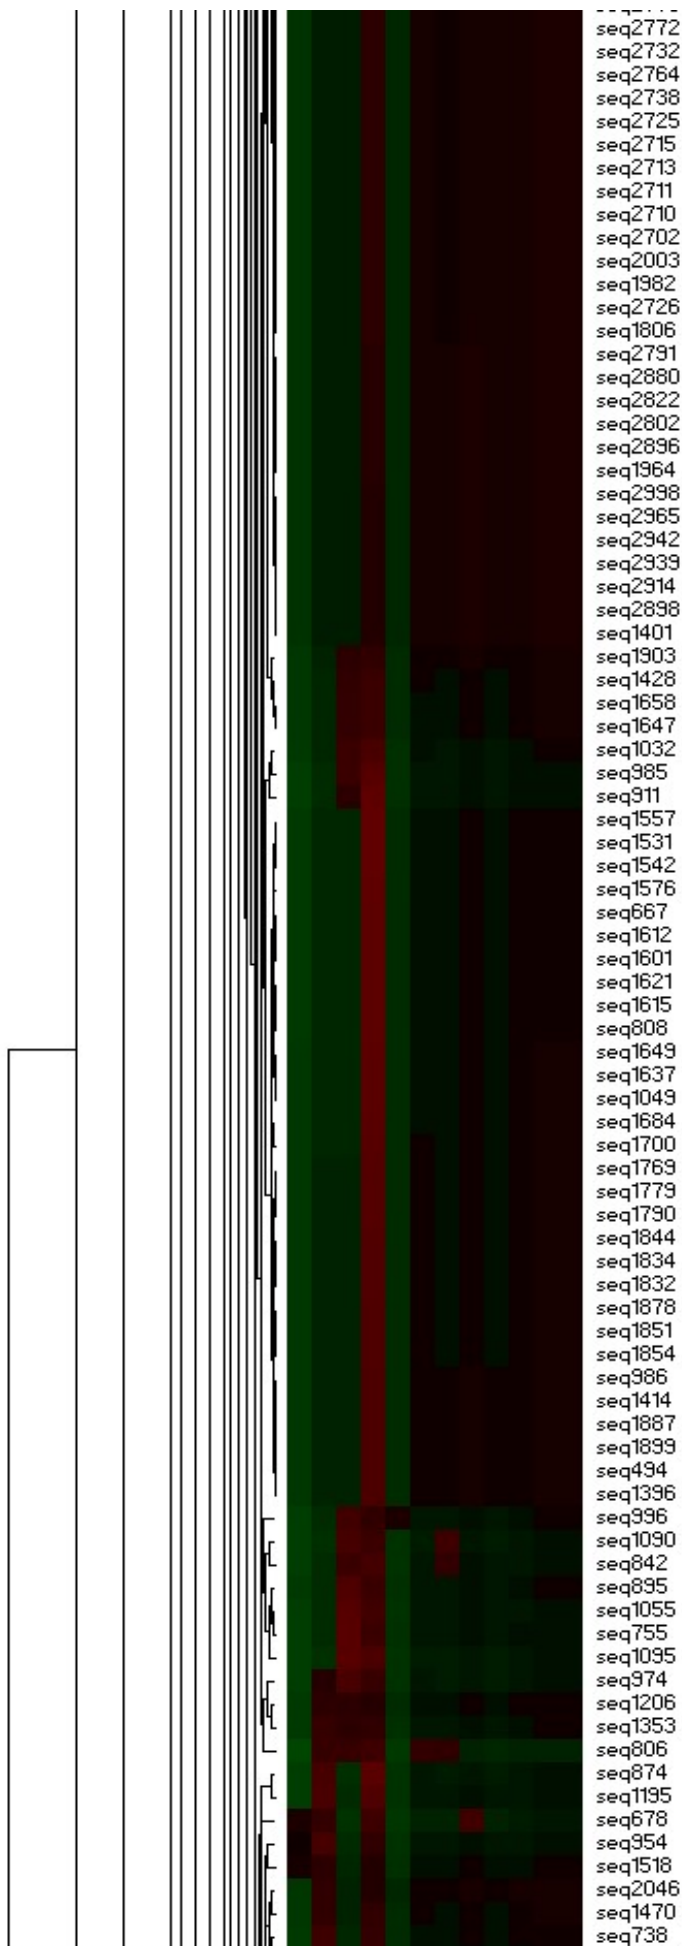

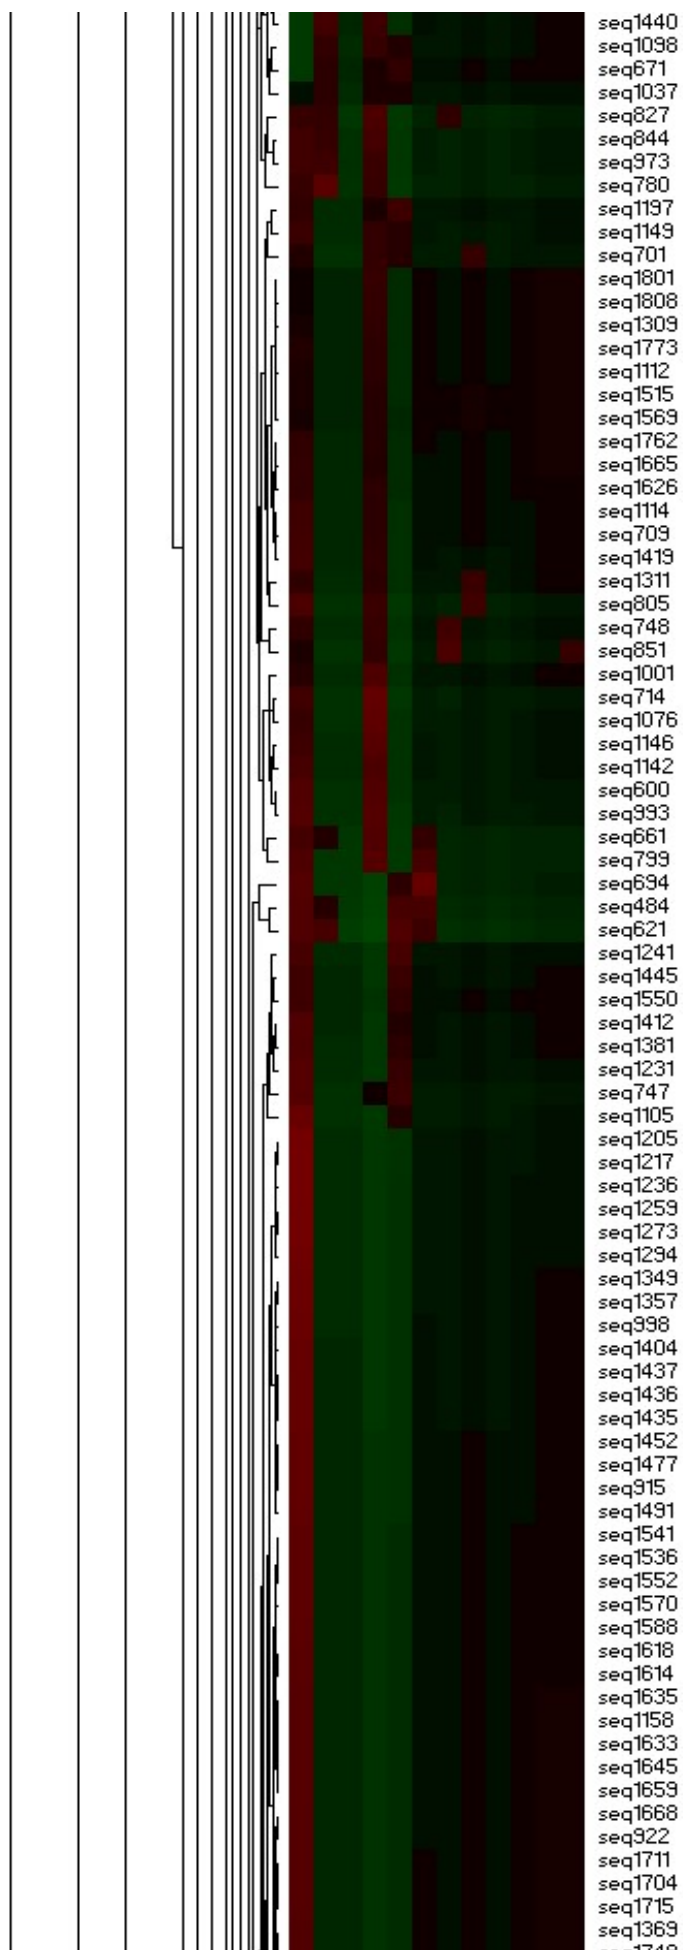



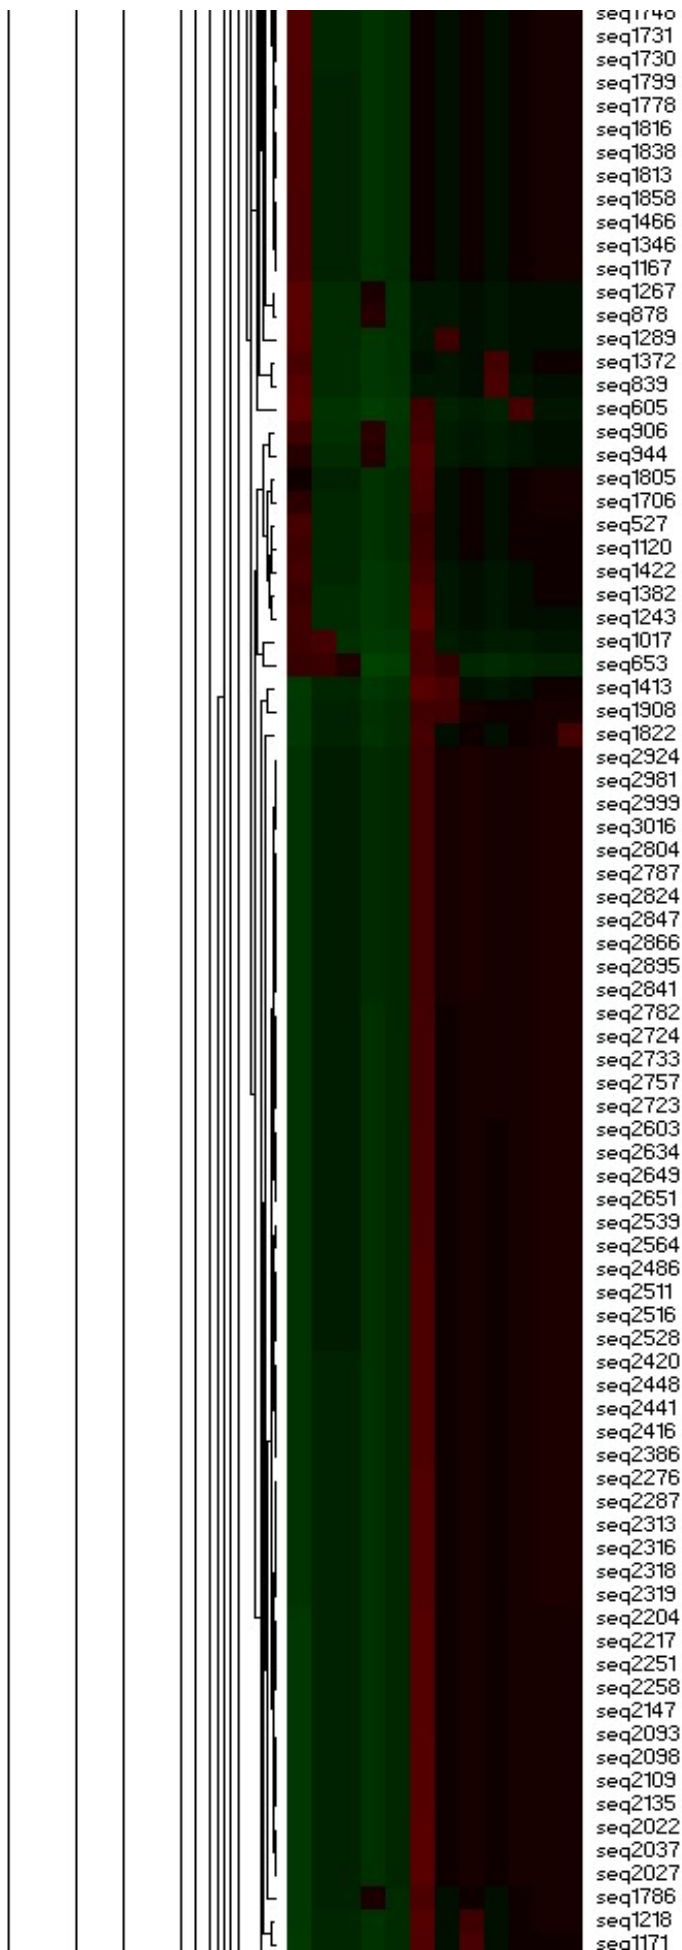

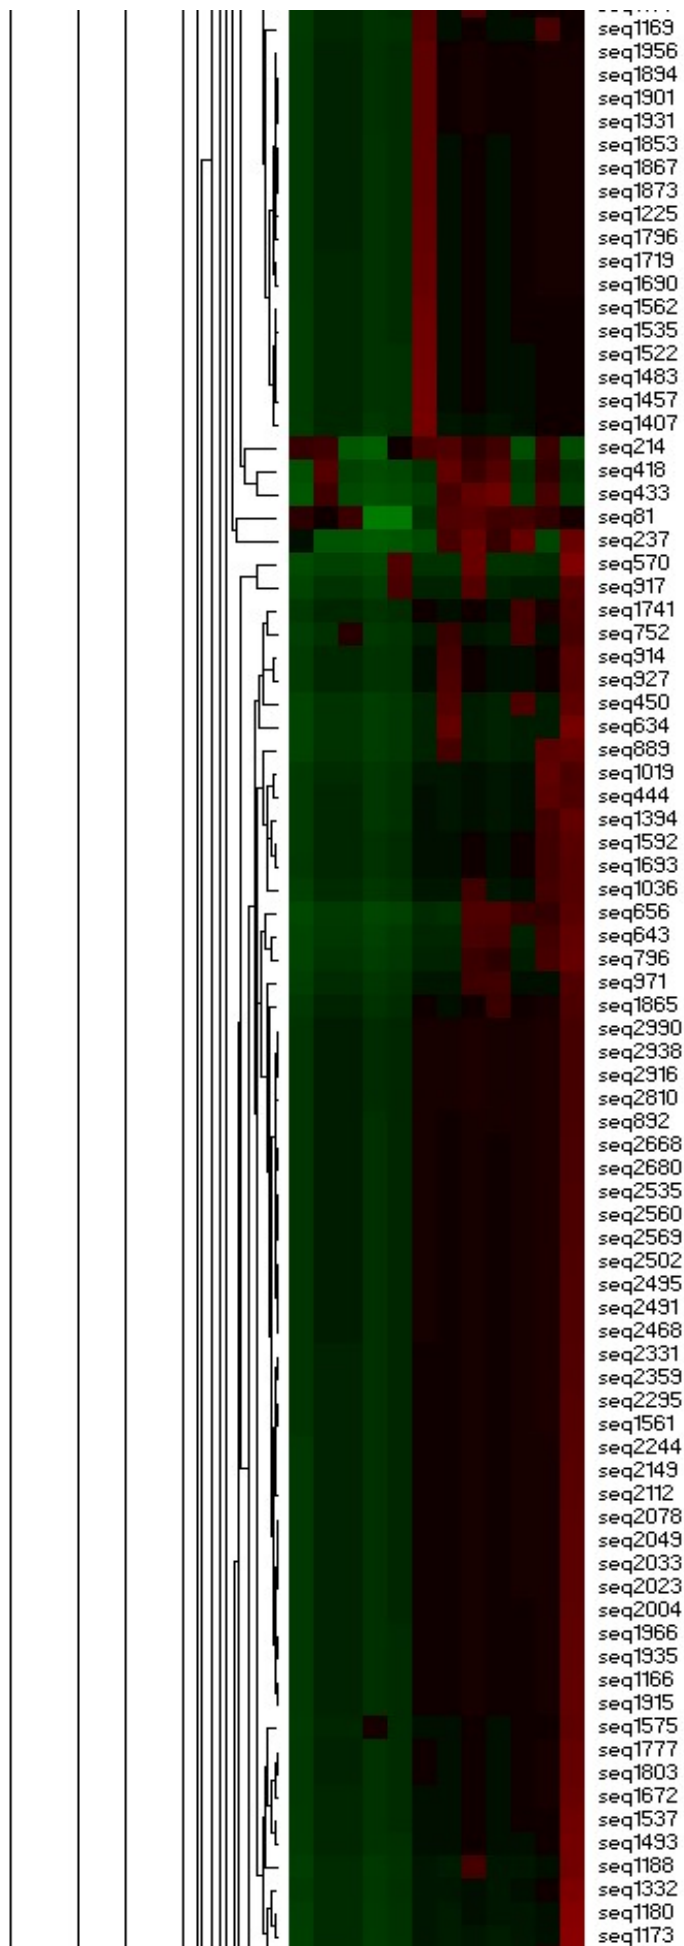

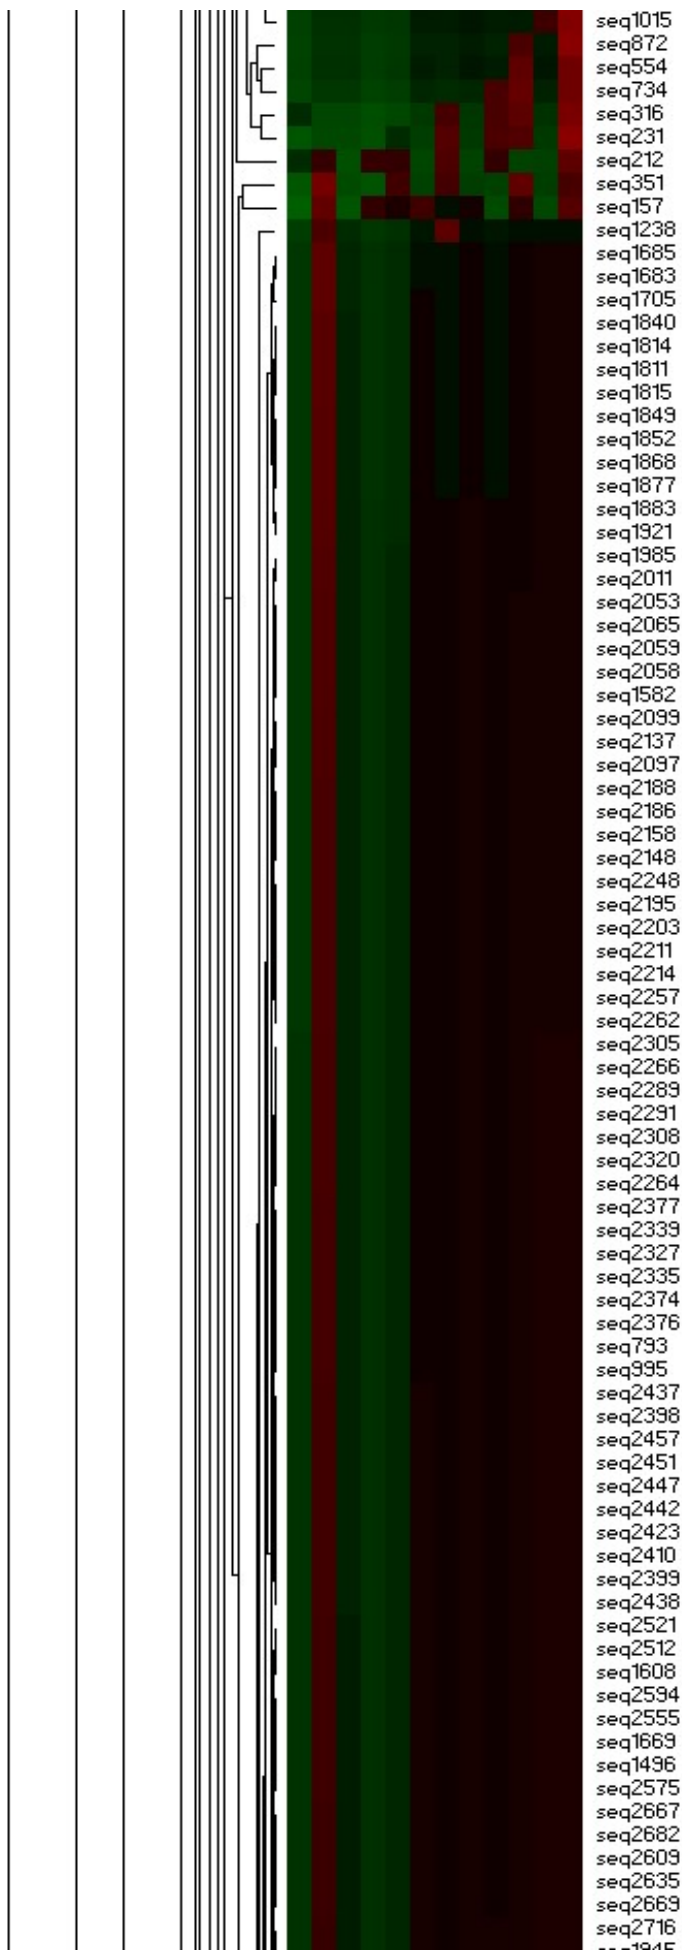

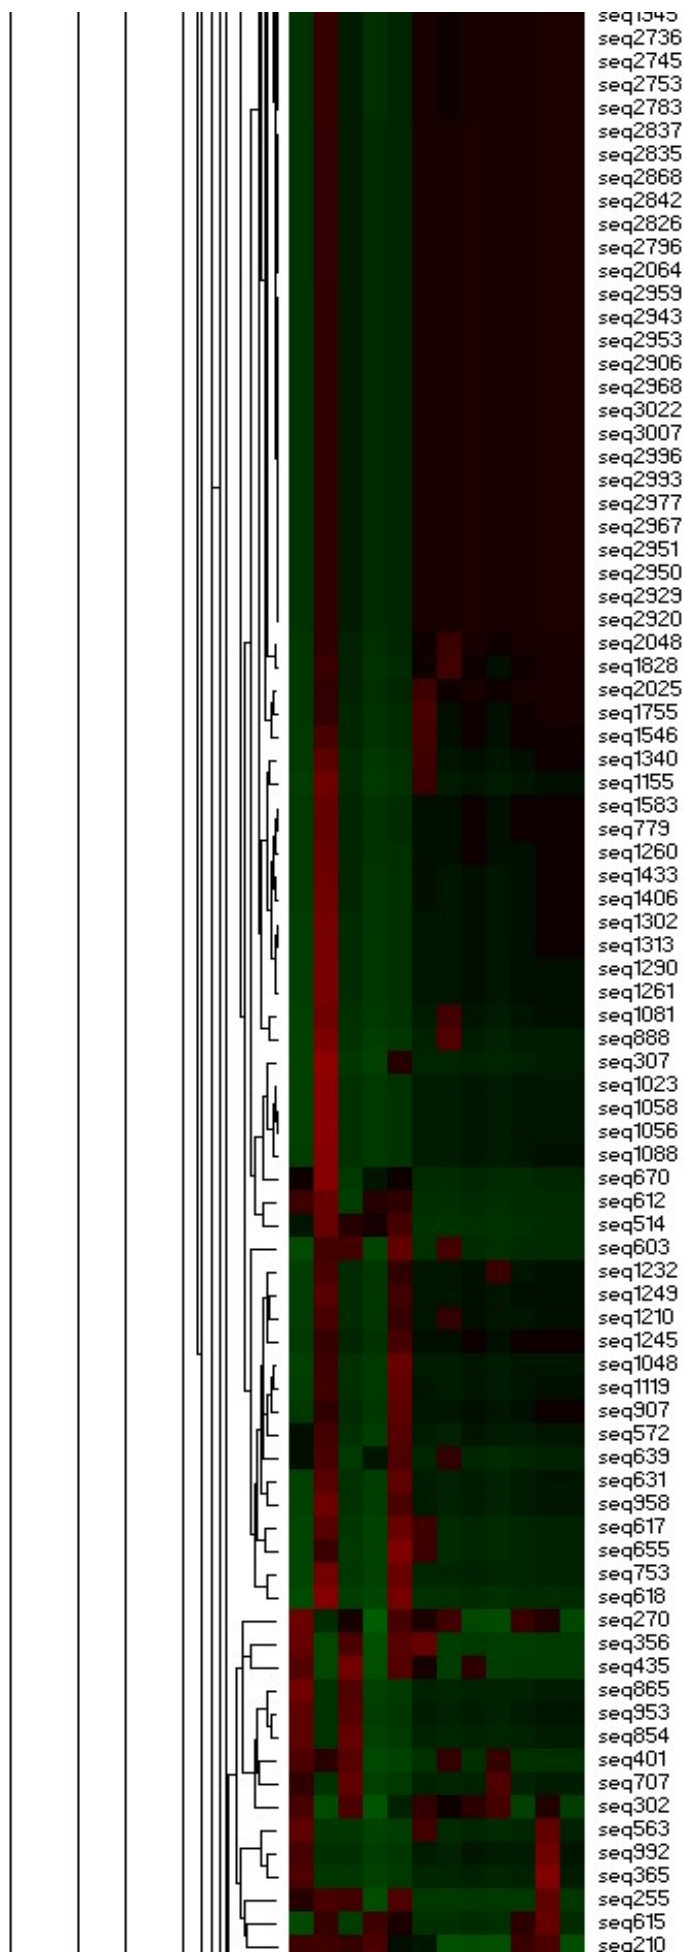

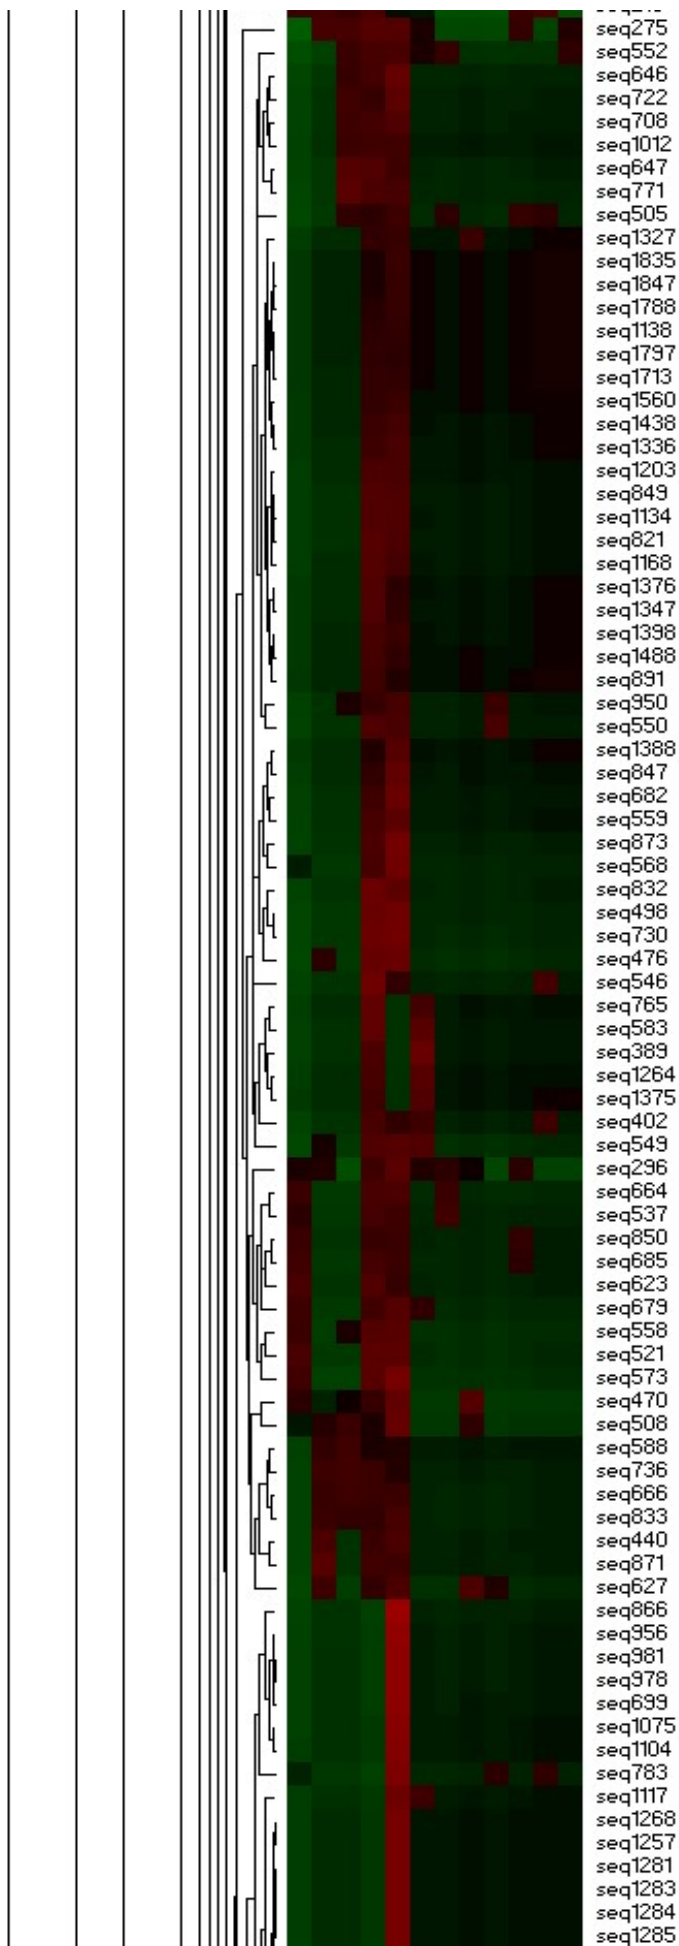

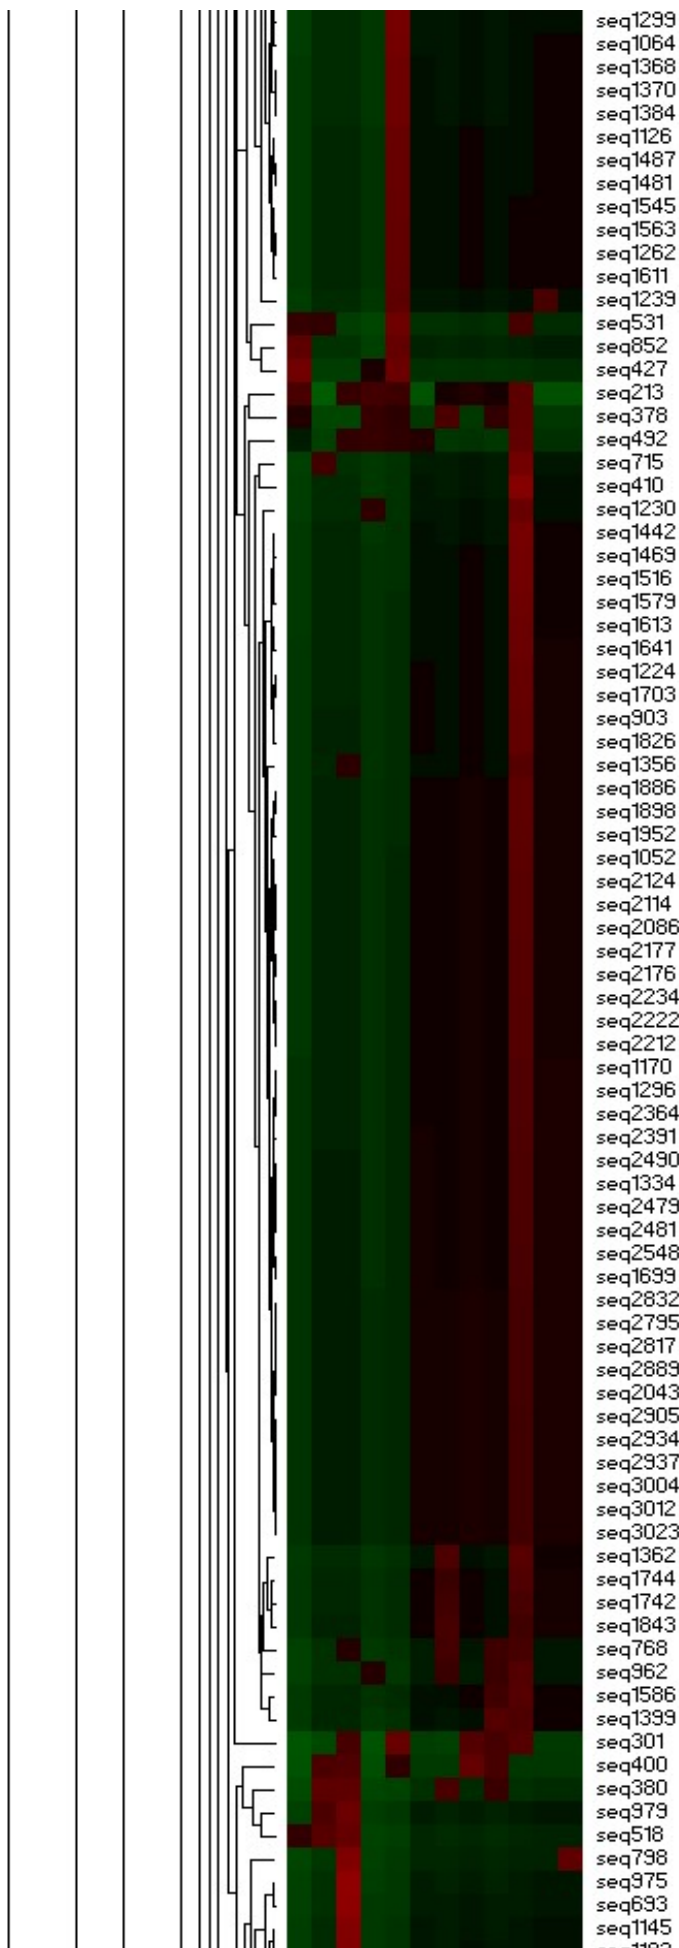

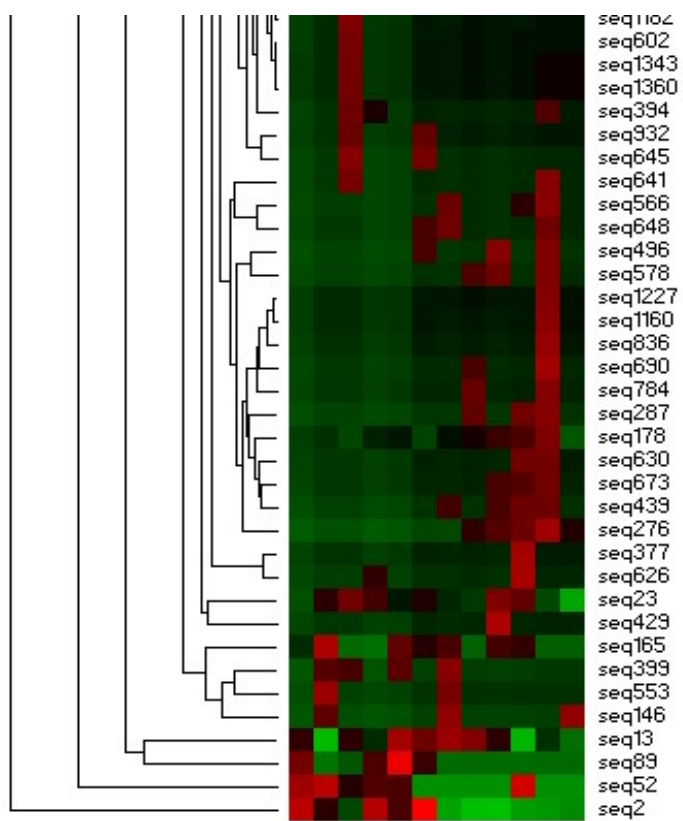

Supplement: s1 [file s1]
